# Supplementary material for: Hydroxyl modified hypercrosslinked polymers: targeting high efficient adsorption separation towards aniline
Source: Royal Society of Chemistry journal article supplement (doi:10.1039/d1nj00914a), 2021-01-01
Supplement: d1nj00914a1.pdf [file d1nj00914a1.pdf]

# Supporting information

## Hydroxyl modified hypercrosslinked polymers: targeting highly efficient adsorption separation towards aniline

*Zishuai Wei, Qibin Chen\*, Honglai Liu*

State Key Laboratory of Chemical Engineering and School of Chemistry & Molecular Engineering, East China University of Science and Technology, Shanghai, 200237, P.R. China

### **Derivation for $K_C$**

The derivation for  $K_C$  from  $K_L$  and  $K_F$  were calculated according to equations (1) and (2) separately:<sup>1</sup>

$$K_C = M_w \times 55.5 \times 1000 \times K_L \quad (1)$$

$$K_c = K_F \times \rho \times \left(\frac{10^6}{\rho}\right)^{\left(1 - \frac{1}{n}\right)} \quad (2)$$

the factor 55.5 and  $M_w$  are the number of moles of pure water per liter (dividing 1000 g·L<sup>-1</sup> by 18 g·mol<sup>-1</sup>) and the relative molecular mass of aniline (93.13 g·mol<sup>-1</sup>), respectively. Where  $\rho$  is the density of pure water (assumption on 1.0 g·mL<sup>-1</sup>).

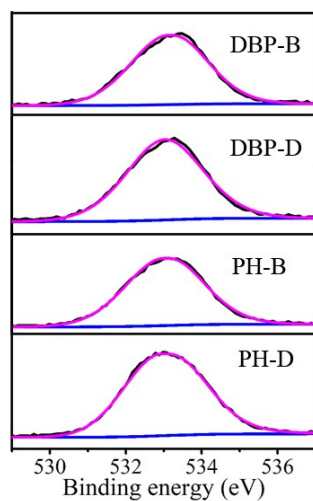

**Figure S1.** XPS O1s scan spectra of DBP-B, DBP-D, PH-B and PH-D.

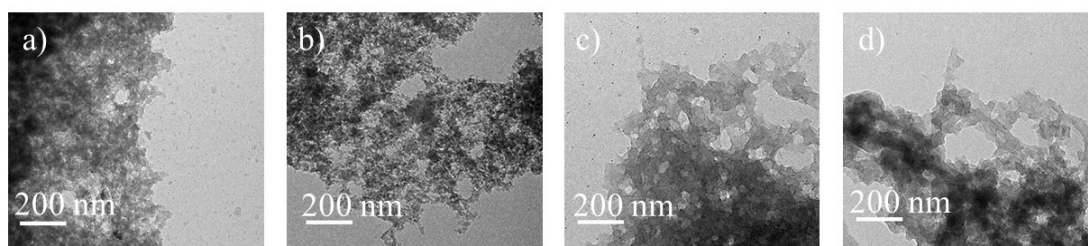

**Figure S2.** TEM images of DBP-B (a), DBP-D (b), PH-B (c) and PH-D (d).

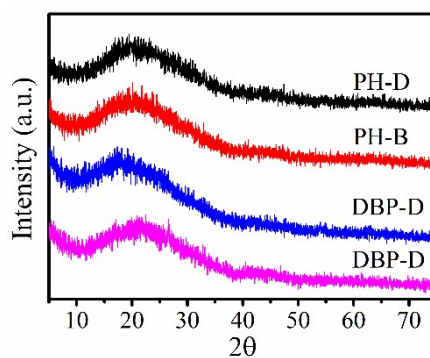

**Figure S3.** The XRD patterns of PH-D, PH-B, DBP-D and DBP-B.

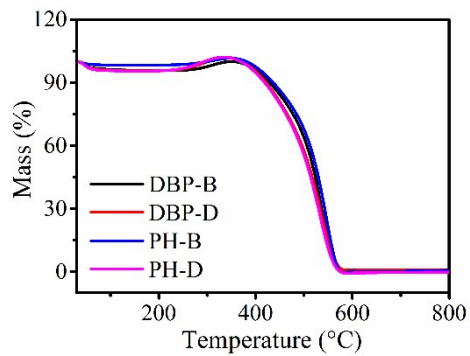

**Figure S4.** TGA curves of PH-D, PH-B, DBP-D and DBP-B.

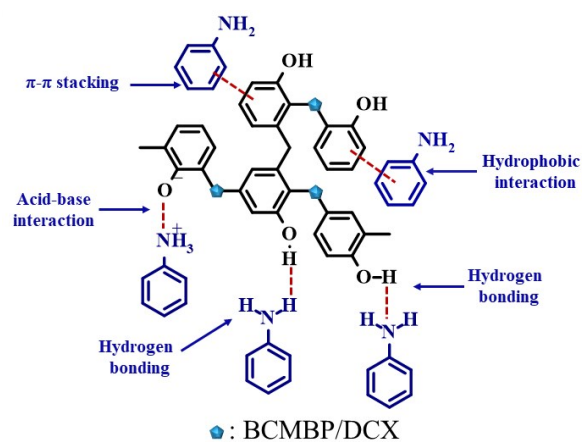

**Figure S5.** Possible interaction of the polymers with aniline.

**Table S1.** Correlated parameters of the equilibrium data for the adsorption of aniline on PH-D, PH-B, DBP-D and DBP-B at 303 K according to the Langmuir, Freundlich, R-P and Temkin model.

| HCPs                                                                  | PH-D    | PH-B    | DBP-D   | DBP-B   |
|-----------------------------------------------------------------------|---------|---------|---------|---------|
| Langmuir model                                                        |         |         |         |         |
| $K_L$ (L·mg <sup>-1</sup> )                                           | 0.01319 | 0.01135 | 0.00987 | 0.00799 |
| $q_{\max}$ (mg·g <sup>-1</sup> )                                      | 158.202 | 171.193 | 205.009 | 227.690 |
| $R^2$                                                                 | 0.9917  | 0.9919  | 0.9949  | 0.9926  |
| Freundlich model                                                      |         |         |         |         |
| $K_F/$<br>(mg·g <sup>-1</sup> ·L <sup>1/n</sup> ·mg <sup>-1/n</sup> ) | 16.6819 | 14.8156 | 14.0962 | 11.5051 |
| $n^{-1}$                                                              | 0.3560  | 0.3851  | 0.4207  | 0.4649  |
| $R^2$                                                                 | 0.9972  | 0.9985  | 0.9957  | 0.9995  |
| R-P model                                                             |         |         |         |         |
| $a$                                                                   | 5.7670  | 6.4060  | 3.5014  | 7.6542  |
| $b$                                                                   | 0.1880  | 0.2544  | 0.0736  | 0.4223  |
| $n$                                                                   | 0.7376  | 0.6954  | 0.7656  | 0.6023  |
| $R^2$                                                                 | 0.9976  | 0.9987  | 0.9974  | 0.9997  |
| Temkin model                                                          |         |         |         |         |
| $K_t$ (L·mg <sup>-1</sup> )                                           | 0.1351  | 0.1114  | 0.0918  | 0.0776  |
| $b$ (J·mol <sup>-1</sup> )                                            | 73.7658 | 66.8695 | 54.5575 | 49.7323 |
| $B$                                                                   | 34.1674 | 37.6911 | 46.2139 | 50.6791 |
| $R^2$                                                                 | 0.9888  | 0.9885  | 0.9904  | 0.9809  |

**Table S2.** Comparison of the  $q_{\max}$  of aniline on four HCPs with some other adsorbents in the literature.

| Adsorbents                      | $q_{\max}/(\text{mg}\cdot\text{g}^{-1})$ | Reference        |
|---------------------------------|------------------------------------------|------------------|
| EFAC                            | 27.10 (298K)                             | 2                |
| SD- $\beta$ -CD                 | 84.03 (288K)                             | 3                |
| PMAA/SiO <sub>2</sub>           | 132.7 (293K)                             | 4                |
| g-C <sub>3</sub> N <sub>4</sub> | 71.9(298K)                               | 5                |
| HCP-P-5%                        | 169.2 (303K)                             | 6                |
| Modified jute fiber             | 125 (298K)                               | 7                |
| SA-HCLP                         | 171.2 (303K)                             | 8                |
| PHBA-HCLP                       | 184.8 (303K)                             | 8                |
| NAC3                            | 125.3 (298K)                             | 9                |
| EC                              | 114.1 (303K)                             | 10               |
| PS-DBP-HCP                      | 198.8 (298K)                             | 11               |
| PS-AI-HCLR                      | 200.6 (308K)                             | 12               |
| PS-PH-HCP                       | 178.4 (303K)                             | 13               |
| coconut shell-AC                | 133.6 (298K)                             | 14               |
| AZO-POP-1                       | 1059.68 (293K)                           | 15               |
| HCPs                            | 769.23 (298K)                            | 16               |
| <b>DBP-B</b>                    | <b>227.7 (303K)</b>                      | <b>This work</b> |

**Table S3.** Correlated parameters of the equilibrium data for the adsorption of aniline on DBP-B at three different temperatures (303, 313 and 323 K) according to the Langmuir and Freundlich model.

|      | Langmuir                        |                                       |        | Freundlich                                                            |          |        |
|------|---------------------------------|---------------------------------------|--------|-----------------------------------------------------------------------|----------|--------|
|      | $K_L/$<br>(L·mg <sup>-1</sup> ) | $q_{\max} /$<br>(mg·g <sup>-1</sup> ) | $R^2$  | $K_F/$<br>(mg·g <sup>-1</sup> ·L <sup>1/n</sup> ·mg <sup>-1/n</sup> ) | $n^{-1}$ | $R^2$  |
| 303K | 0.00799                         | 227.690                               | 0.9926 | 11.505                                                                | 0.4649   | 0.9995 |
| 313K | 0.00652                         | 222.320                               | 0.9941 | 8.8540                                                                | 0.4942   | 0.9983 |
| 323K | 0.00539                         | 218.843                               | 0.9933 | 6.7868                                                                | 0.5246   | 0.9982 |

**Table S4.** Thermodynamic parameters for the adsorption of aniline on DBP-B.

|       | Langmuir                              |                                       |                                                       | Freundlich                            |                                       |                                                       |
|-------|---------------------------------------|---------------------------------------|-------------------------------------------------------|---------------------------------------|---------------------------------------|-------------------------------------------------------|
|       | $\Delta G$<br>(KJ·mol <sup>-1</sup> ) | $\Delta H$<br>(KJ·mol <sup>-1</sup> ) | $\Delta S$<br>(J·mol <sup>-1</sup> ·K <sup>-1</sup> ) | $\Delta G$<br>(KJ·mol <sup>-1</sup> ) | $\Delta H$<br>(KJ·mol <sup>-1</sup> ) | $\Delta S$<br>(J·mol <sup>-1</sup> ·K <sup>-1</sup> ) |
| 303 K | -26.775                               | -16.044                               | 35.421                                                | -23.555                               | -21.465                               | 6.928                                                 |
| 313 K | -27.130                               | -16.044                               | 35.421                                                | -23.651                               | -21.465                               | 6.928                                                 |
| 323 K | -27.485                               | -16.044                               | 35.421                                                | -23.692                               | -21.465                               | 6.928                                                 |
| $R^2$ |                                       | 0.99999                               |                                                       |                                       | 0.99896                               |                                                       |

**Table S5.** Correlated parameters of the kinetic data for the adsorption of aniline on DBP-B at three different temperatures (303, 313 and 323 K) according to the pseudo-first-order kinetic model and the pseudo-second-order kinetic model.

|      | pseudo-first-order |                                   |        | pseudo-second-order                                   |                                   |        |
|------|--------------------|-----------------------------------|--------|-------------------------------------------------------|-----------------------------------|--------|
|      | $K_1/$             | $q_e/$                            | $R^2$  | $K_2/$                                                | $q_e/$                            | $R^2$  |
|      |                    | ( $\text{mg}\cdot\text{g}^{-1}$ ) |        | ( $\text{g}\cdot\text{mg}^{-1}\cdot\text{min}^{-1}$ ) | ( $\text{mg}\cdot\text{g}^{-1}$ ) |        |
| 303K | 0.1475             | 177.67                            | 0.9961 | $9.96\times 10^{-4}$                                  | 198.56                            | 0.9856 |
| 313K | 0.4419             | 162.53                            | 0.9963 | $4.29\times 10^{-3}$                                  | 176.68                            | 0.9783 |
| 323K | 2.1876             | 142.22                            | 0.9938 | $2.34\times 10^{-2}$                                  | 153.85                            | 0.9980 |

**Table S6.** Intra-particle diffusion parameters for the adsorption of aniline from aqueous solution by DBP-B at 303 K.

|                           | $K_d$ ( $\text{mg}/(\text{g}\cdot\text{min}^{1/2})$ ) | $I$ ( $\text{mg}\cdot\text{g}^{-1}$ ) | $R^2$  |
|---------------------------|-------------------------------------------------------|---------------------------------------|--------|
| the first linear portion  | 45.82                                                 | -13.229                               | 0.9761 |
| the second linear portion | 3.19                                                  | 152.611                               | 0.9781 |

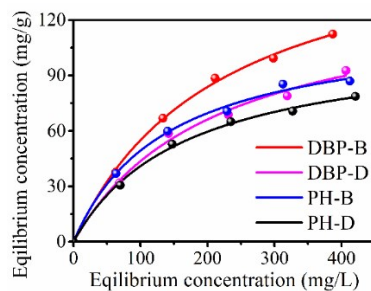

Figure S6. Equilibrium adsorption data of DBP-B, DBP-D, PH-B and PH-D for phenol at 303 K, fitted with Langmuir model.

## Reference

1. Tran, H. N.; You, S. J.; Chao, H. P. Thermodynamic parameters of cadmium adsorption onto orange peel calculated from various methods: A comparison study. *J. Environ. Chem. Eng.*, 2016, 4, 2671-2682.
2. H. Y. Li, L. X. Liu, J. G. Cui, J. L. Cui, F. Wang, F. Zhang, High-efficiency adsorption and regeneration of methylene blue and aniline onto activated carbon from waste edible fungus residue and its possible mechanism, *RSC Advances*, 2020, 10, 14262.
3. Q. Hu, D. W. Gao, H. Y. Pan, L. L. Hao, P. Wang, Equilibrium and kinetics of aniline adsorption onto crosslinked sawdust-cyclodextrin polymers, *RSC Advances*, 2014, 4, 40071.
4. F. Q. An, X. Q. Feng, B. J. Gao, Adsorption property and mechanism of composite adsorbent PMAA/SiO<sub>2</sub> for aniline, *Journal of Hazardous Materials*, 2010, 178, 499-504.
5. R. Hu, X. K. Wang, S. Y. Dai, D. D. Shao, T. Hayat, A. Alsaedi, Application of graphitic carbon nitride for the removal of Pb(II) and aniline from aqueous solutions, *Chem. Eng. J.*, 2015, 260, 469-477.
6. W. Kuang, Y. N. Liu, J. H. Huang, Phenol-modified hyper-cross-linked resins with almost all micro/mesopores and their adsorption to aniline, *J. Colloids Interfaces Sci.*, 2017, 487, 31-37.
7. D. W. Gao, Q. Hu, H. Y. Pan, J. P. Jiang, P. Wang, High-capacity adsorption of aniline using surface modification of lignocellulose-biomass jute fibers, *Bioresour. Technol.*, 2015, 193, 507-512.
8. X. M. Wang, X. Mao, J. H. Huang, Hierarchical porous hyper-cross-linked polymers modified with phenolic hydroxyl groups and their efficient adsorption of aniline from aqueous solution, *Colloids and Surfaces A*, 2018, 558, 80-87.
9. C.Y. Chen, X.H. Geng, W.L. Huang, Adsorption of 4-chlorophenol and aniline by nanosized activated carbons, *Chem. Eng. J.*, 2017, 327, 941-952.
10. D. Jiang, J. A. Yang, D. H. Wang, Green Carbon Material for Organic Contaminants



Adsorption, Langmuir, 2020, 36, 3141-3148.

11. Y. Wang, Y. Q. Gan, J. H. Huang, Hyper-Cross-Linked Phenolic Hydroxyl Polymers with Hierarchical Porosity and Their Efficient Adsorption Performance, Ind. Eng. Chem. Res., 2020, 59, 11275-11283.

12. X. Zeng, J. H. Huang., Anisole-modified hyper-cross-linked resins for efficient adsorption of aniline from aqueous solution, J. Colloids Interfaces Sci., 2020, 569, 177-183.

13. Y. Q. Gan, G. Chen, Y. F. Sang, F. Zhou, R. L. Man, J. H. Huang. Oxygen-rich hyper-cross-linked polymers with hierarchical porosity for aniline adsorption, Chem. Eng. J., 2019, 368, 29-36.

14. C. Chen, X. Geng, W. Huang, Adsorption of 4-chlorophenol and aniline by nanosized activated carbons, Chem. Eng. J., 2017, 327, 941-952.

15. J. X. Zhou, X. S. Luo, X. X. Liu, Y. Qiao, P. F. Wang, D. Mecerreyes, N. Bogliotti, S. L. Chen, M. H. Huang. Azo-linked porous organic polymers: robust and time-efficient synthesis via NaBH<sub>4</sub>-mediated reductive homocoupling on polynitro monomers and adsorption capacity towards aniline in water, J. Mater. Chem. A, 2018, 6, 5608-5612.

16. Y. Liu, X. L. Fan, X. K. Jia, B. L. Zhang, H. P. Zhang, A. B. Zhang, Q. Y. Zhang. Hypercrosslinked polymers: controlled preparation and effective adsorption of aniline, J. Mater. Sci., 2016, 51, 8579-8592.
